# Supplementary material for: Ultrasensitive and reproducible surface-enhanced Raman scattering detection via an optimized adsorption process and filter-based substrate
Source: Royal Society of Chemistry journal article supplement (doi:10.1039/c3ay42153h), 2014-01-01
Supplement: c3ay42153h1.pdf [file c3ay42153h1.pdf]

## Supporting Information

### **Ultrasensitive and reproducible Surface-Enhanced Raman Scattering detection via optimized adsorption process and filter-based substrate**

*Xiao-long Wang<sup>1, 2</sup>, Rui-long Zong<sup>1\*</sup>, Shi-kao Shi<sup>2\*</sup> and Yongfa Zhu<sup>1</sup>*

1. Beijing Key Laboratory for Microanalytical Methods and Instrumentation,  
Department of Chemistry, Tsinghua University, Beijing 100084, China
2. College of Chemistry and Materials Science, Hebei Normal University,  
Shijiazhuang 050024, China

**Corresponding author:**

- \* E-mail: zrl01@mails.tsinghua.edu.cn; Tel.: +86-10-62781686 (Ruiling Zong)  
E-mail:ssk02@mails.tsinghua.edu.cn; Tel: +86-311-80787402 (Shi-kao Shi)

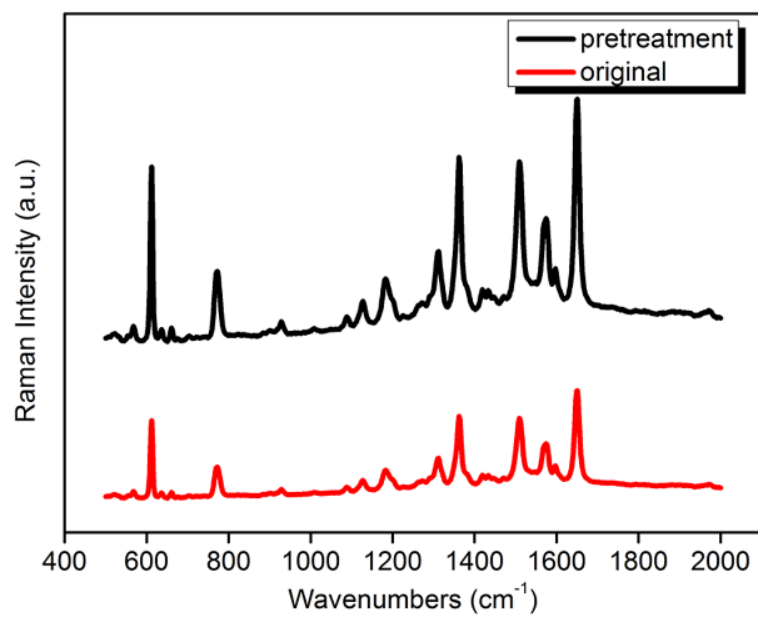

**Figure S1.** Representative SERS intensities of  $10^{-6}$  M R6G in the untreated and the optimized conditions.

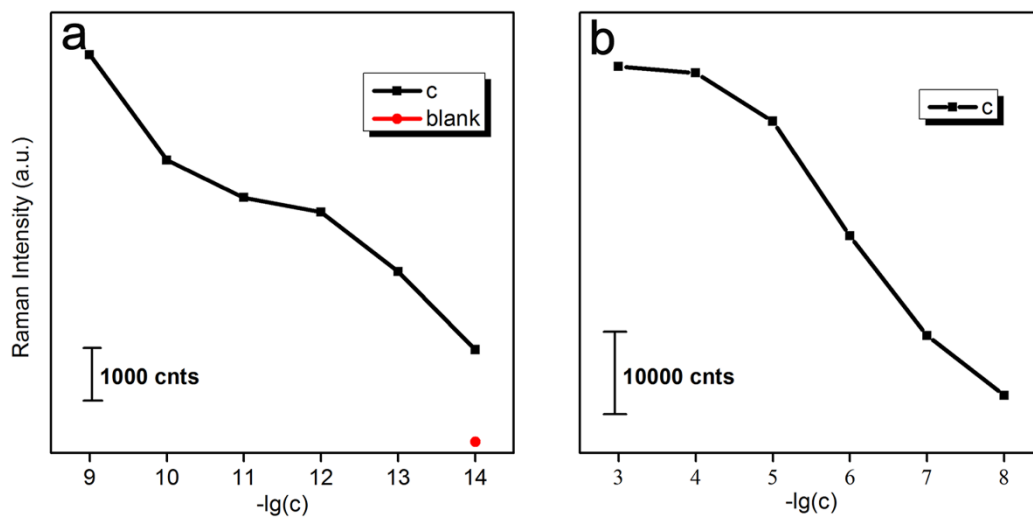

**Figure S2.** The linear relationship between SERS intensities and the concentration of R6G.

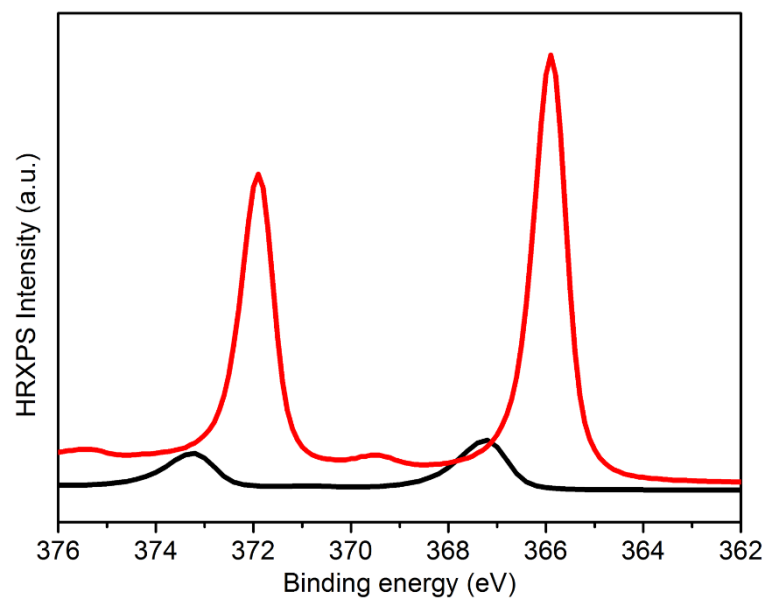

**Figure S3.** XPS spectra of the fresh Ag NPs supported on filter membrane (red) and three month later (black).
